# Supplementary material for: Evidence of Human Milk Oligosaccharides in Cord Blood and Maternal-to-Fetal Transport across the Placenta
Source: PubMed Central journal article supplement (PMC6893815; doi:10.3390/nu11112640), 2019-11-04

## ***Supplementary Material***

### **Evidence of Human Milk Oligosaccharides in cord blood and maternal to fetal transport across the placenta**

Birgit Hirschmugl<sup>1,2</sup>, Waltraud Brandl<sup>1</sup>, Bence Csapo<sup>1</sup>, Mireille van Poppel<sup>2,3</sup>, Harald Köfeler<sup>2,4</sup>, Gernot Desoye<sup>1</sup>, Christian Wadsack<sup>1,2</sup>, Evelyn Jantscher-Krenn<sup>1,2\*</sup>

<sup>1</sup>Department of Obstetrics and Gynecology, Medical University of Graz, Graz, Austria;

<sup>2</sup>BioTechMed-Graz, Austria; <sup>3</sup>Institute of Sport Science, University of Graz, Graz, Austria;

<sup>3</sup>Core Facility Mass Spectrometry, Center for Medical Research, Medical University of Graz, Graz, Austria

**Running title:** HMOs in cord blood

**Keywords:** Human Milk Oligosaccharides (HMO); placenta; placental transport; secretor status; pregnancy; fetal circulation; 2'-fucosyllactose

**Word count:** 3952

**\*Correspondence:** Evelyn Jantscher-Krenn, PhD; ORCID ID 0000-0003-3568-891X

Department of Obstetrics and Gynecology, Medical University of Graz, Auenbruggerplatz 14/2, 8036 Graz, Austria

Tel +43 316 385 80076

Fax +43 316 385 12506

Email [evelyn.jantscher-krenn@medunigraz.at](mailto:evelyn.jantscher-krenn@medunigraz.at)

This contains

- 1) HPLC plots of HMOs isolated from all investigated maternal serum and cord serum samples
- 2) Supplementary Figure 1 showing correlation plots of relative concentrations of HMOs

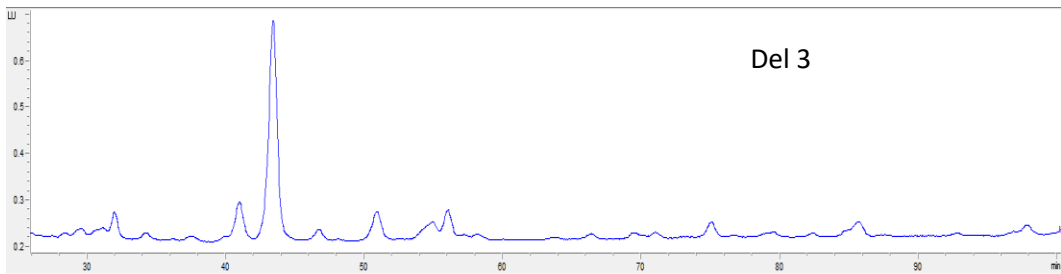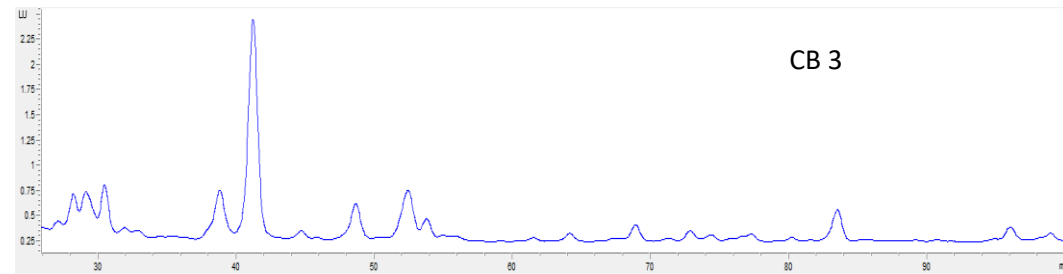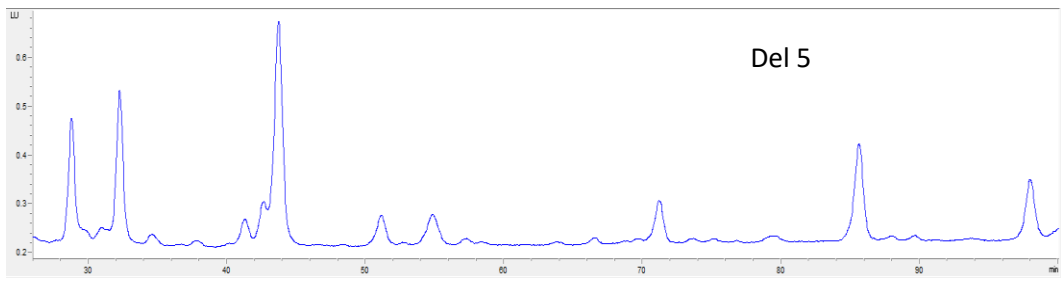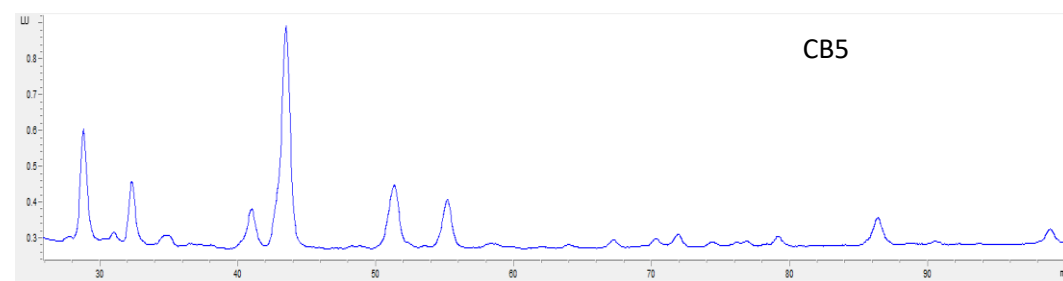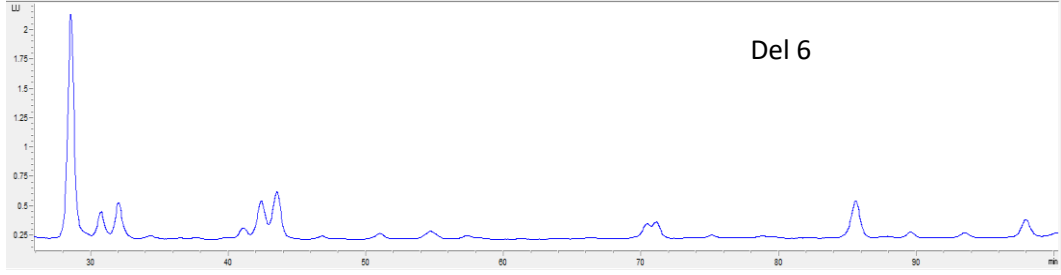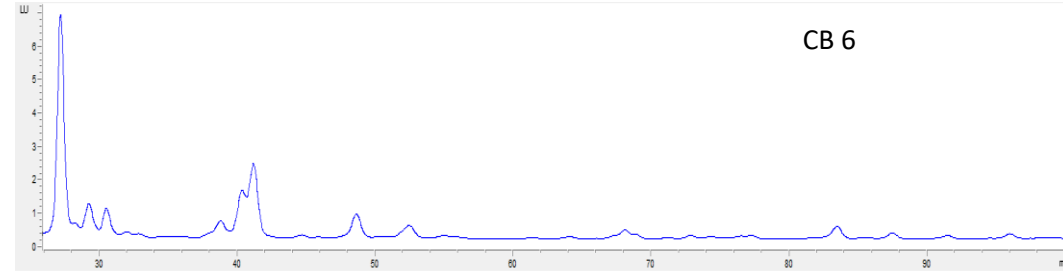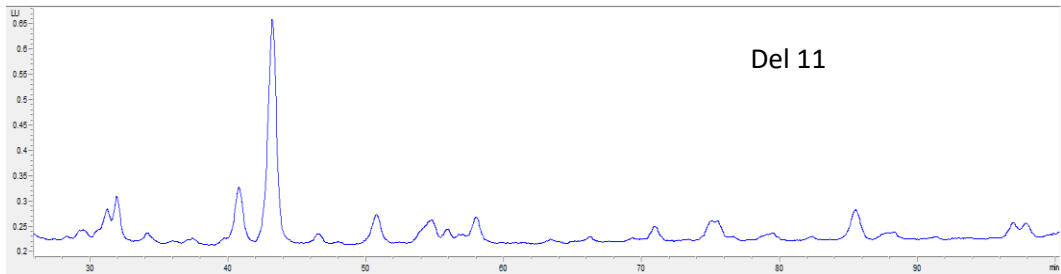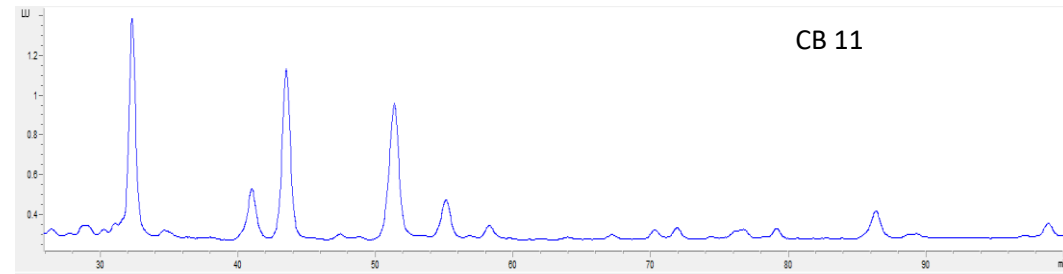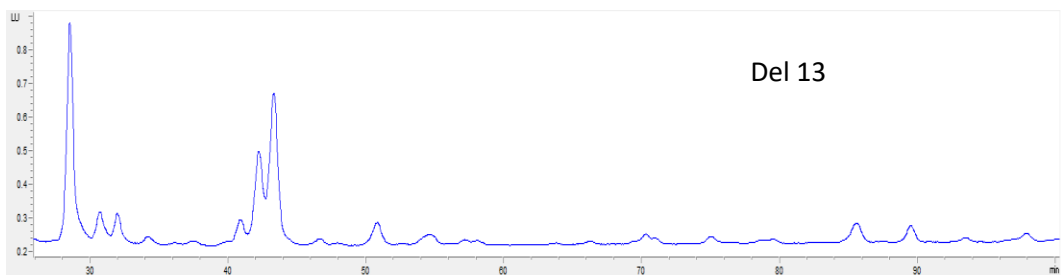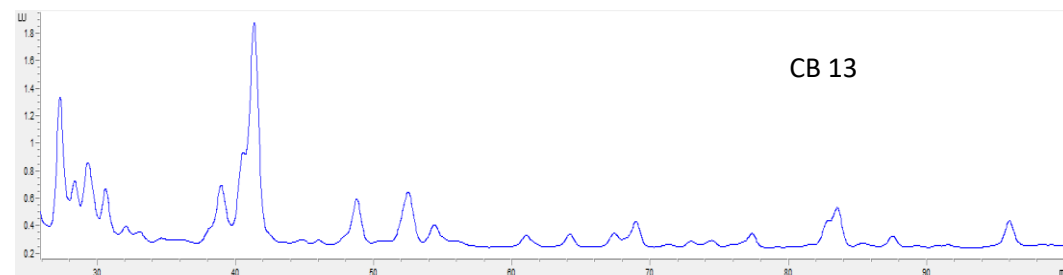

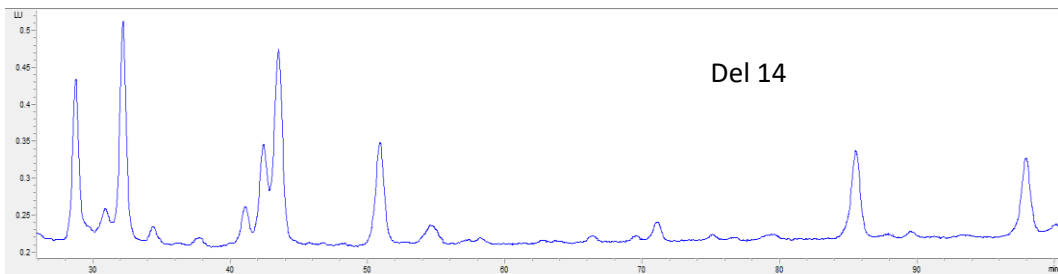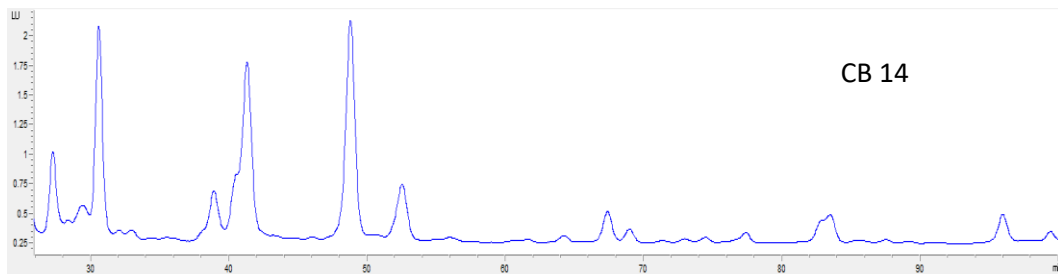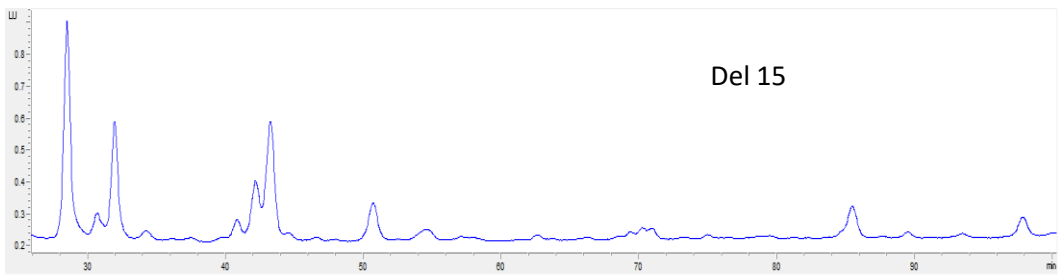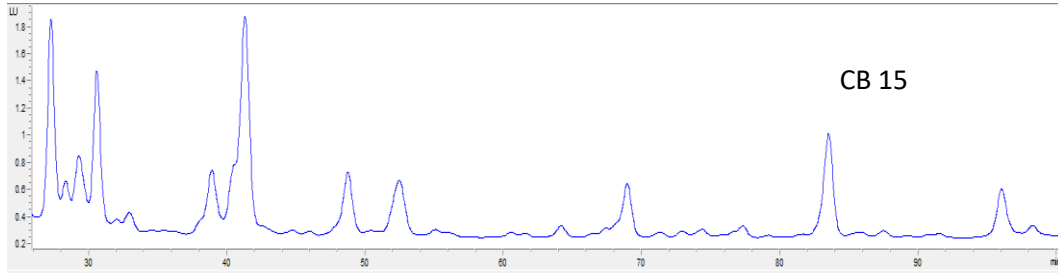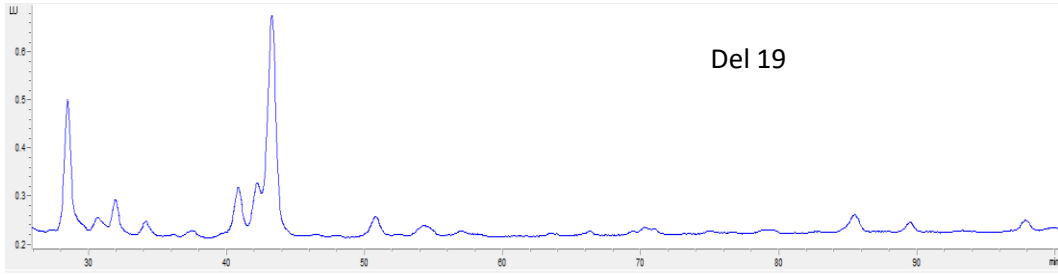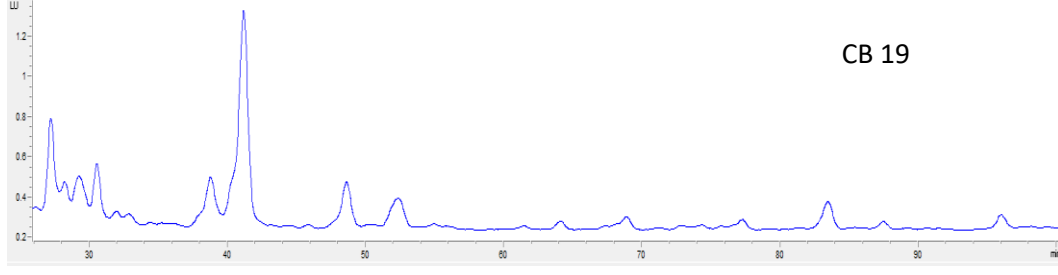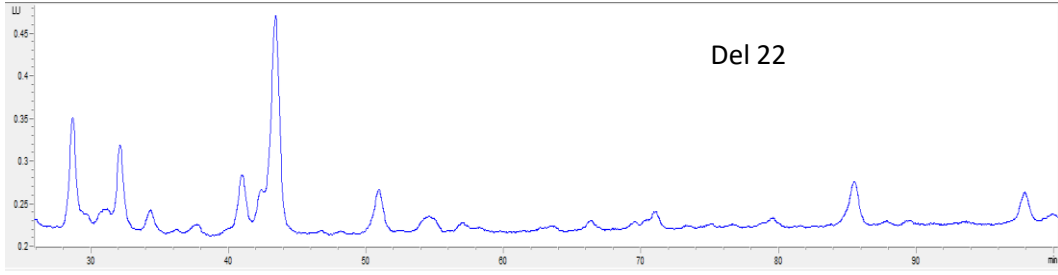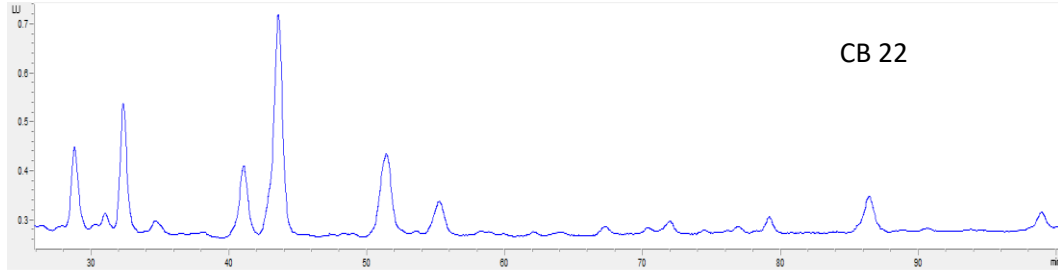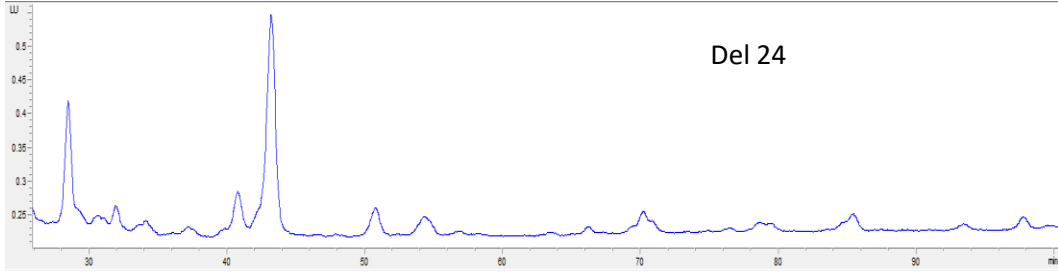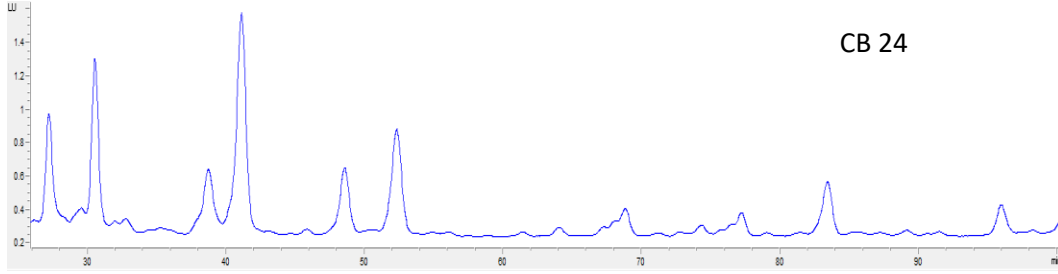

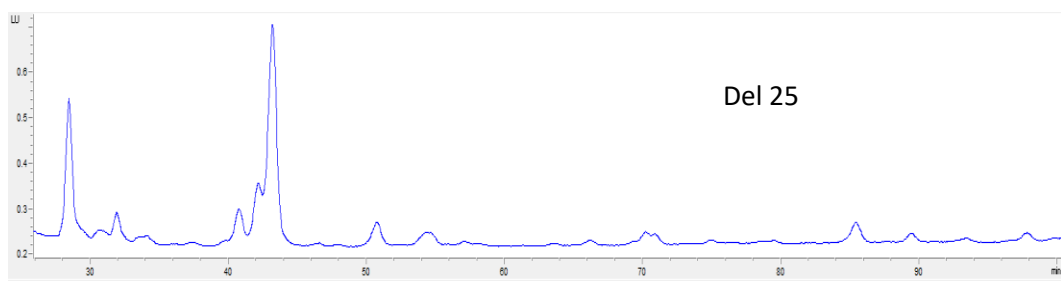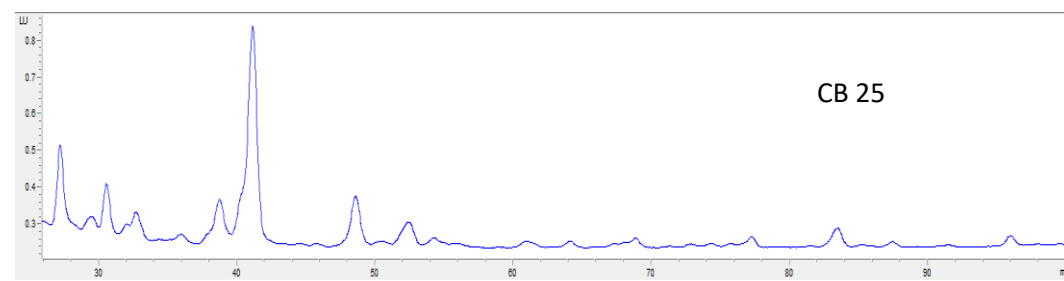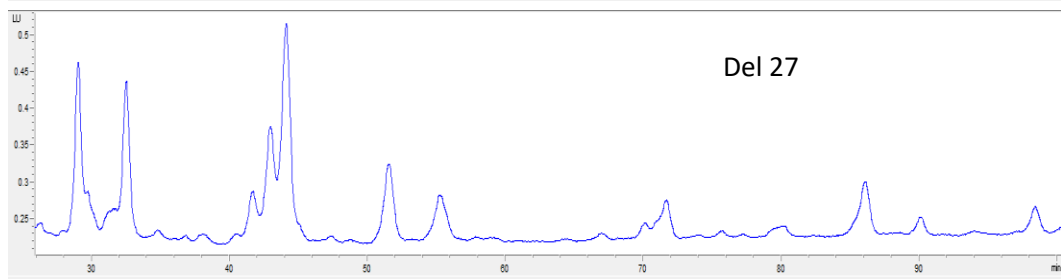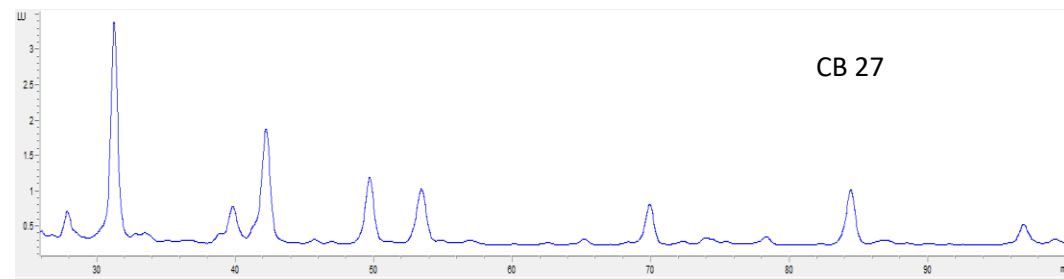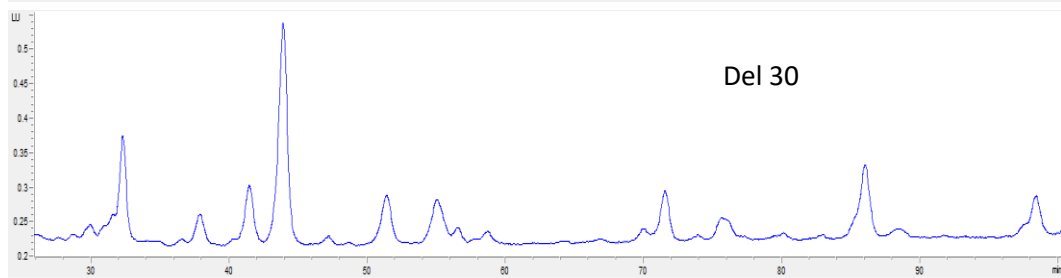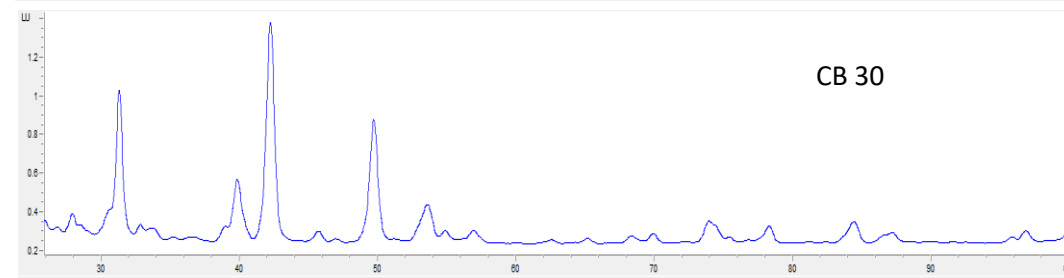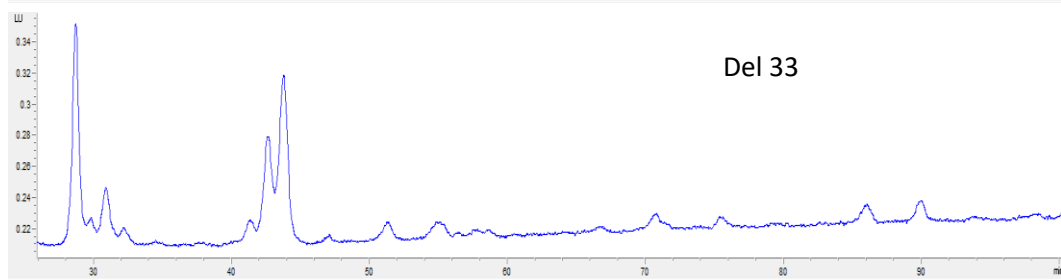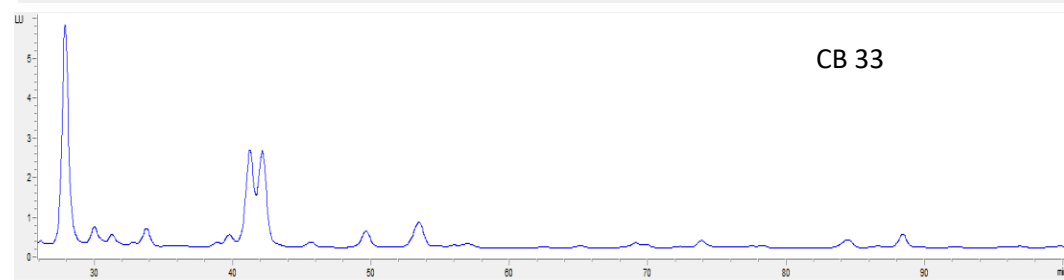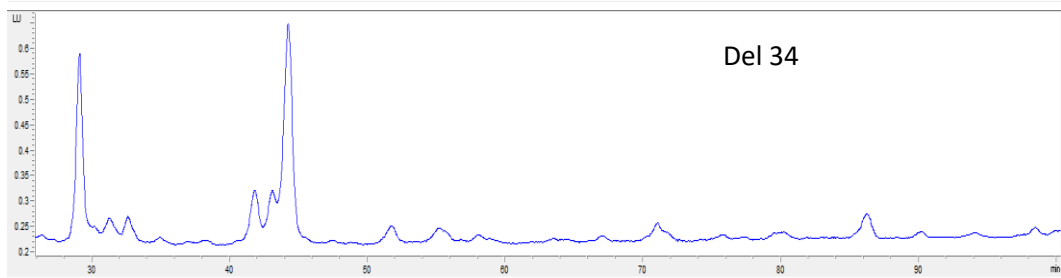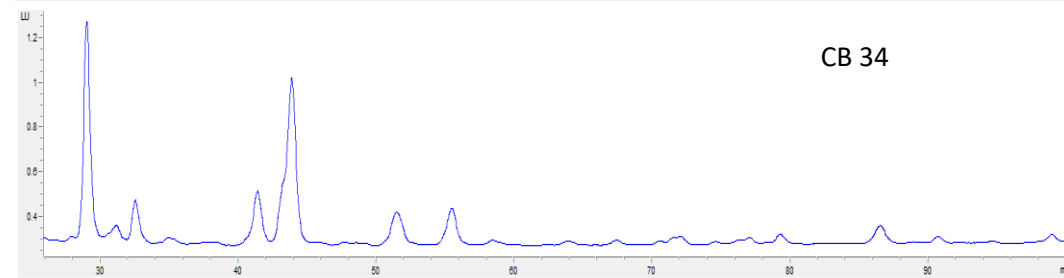

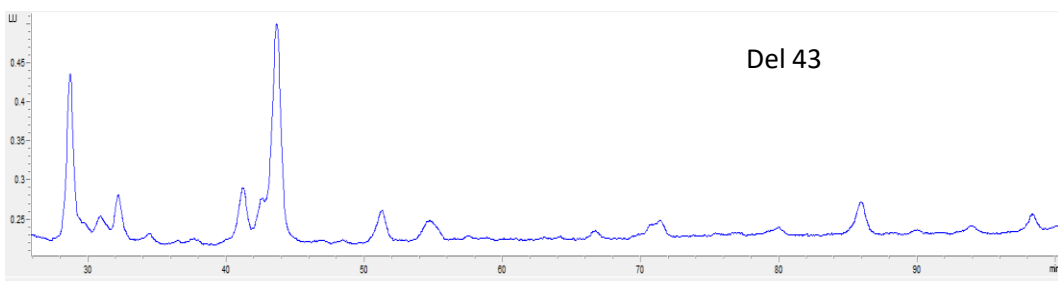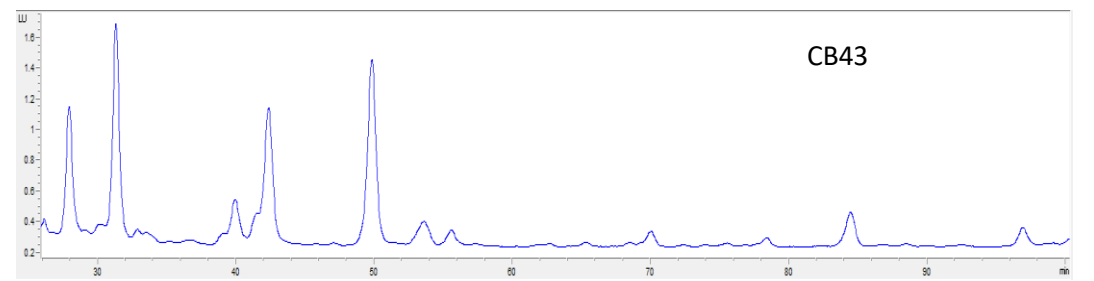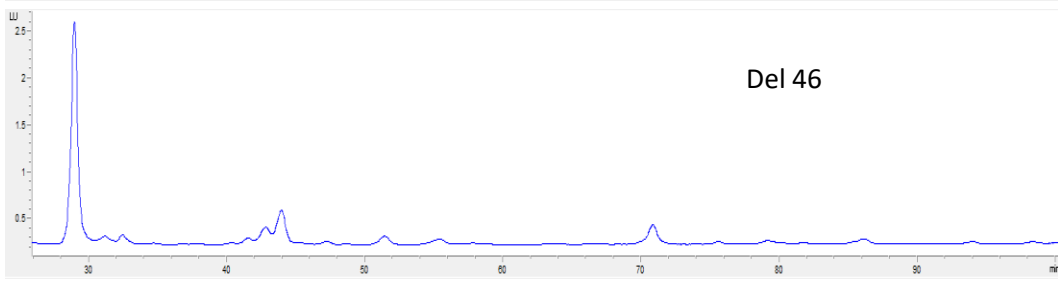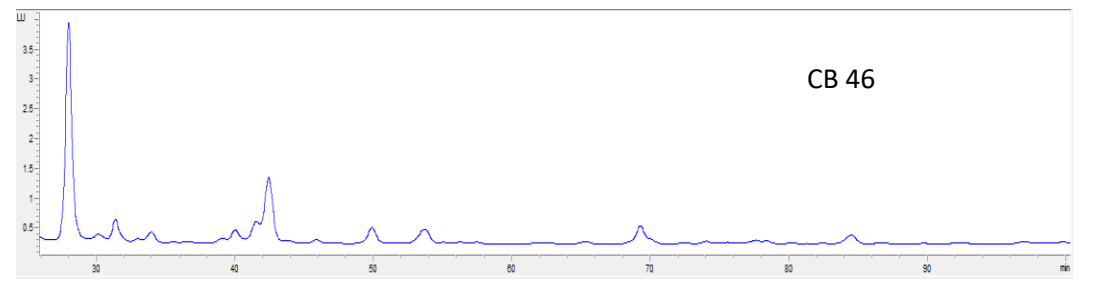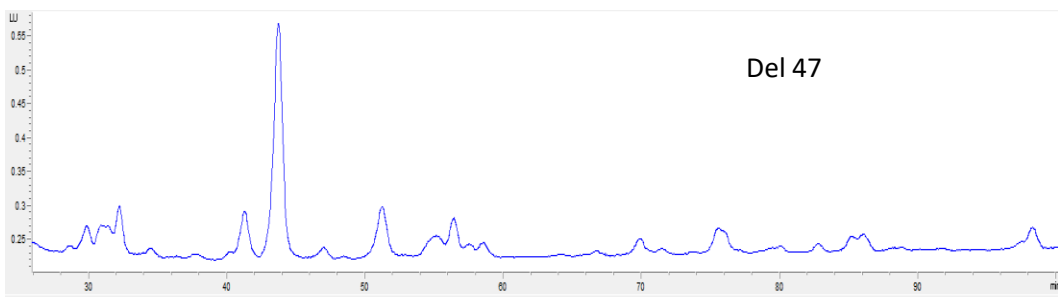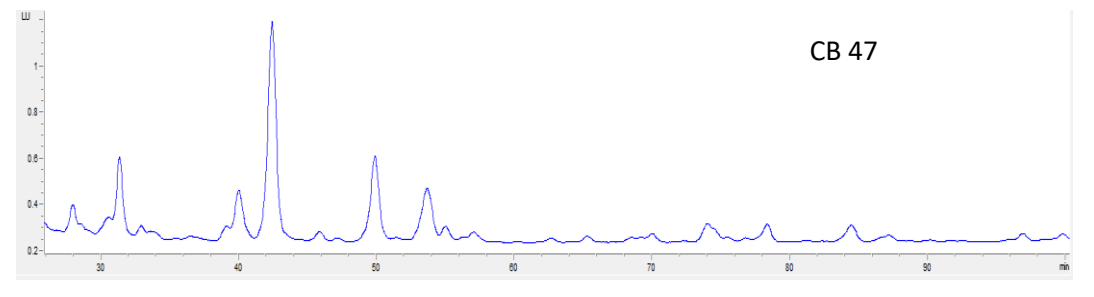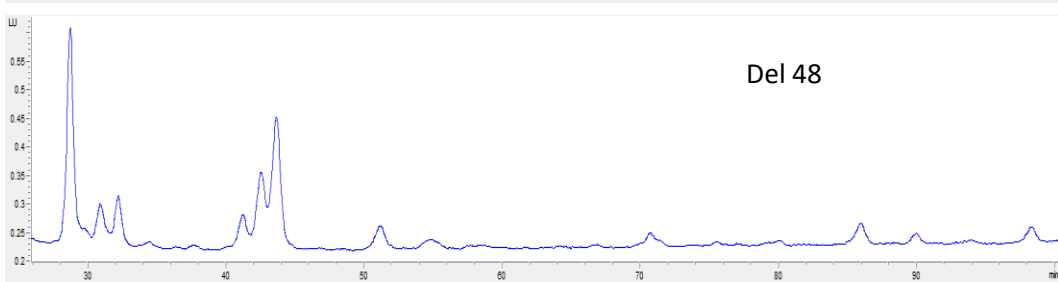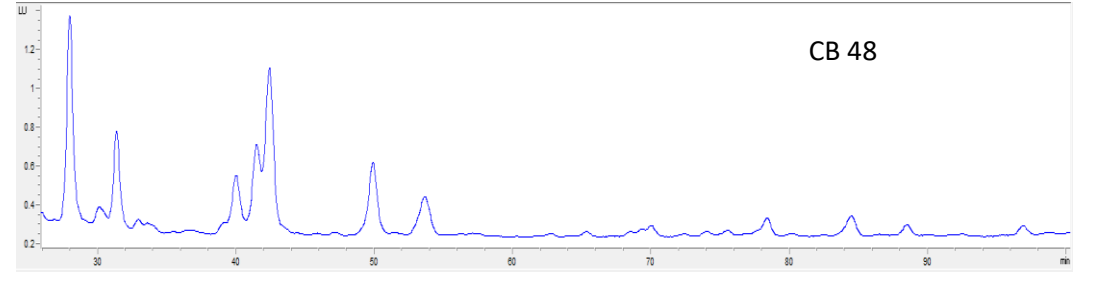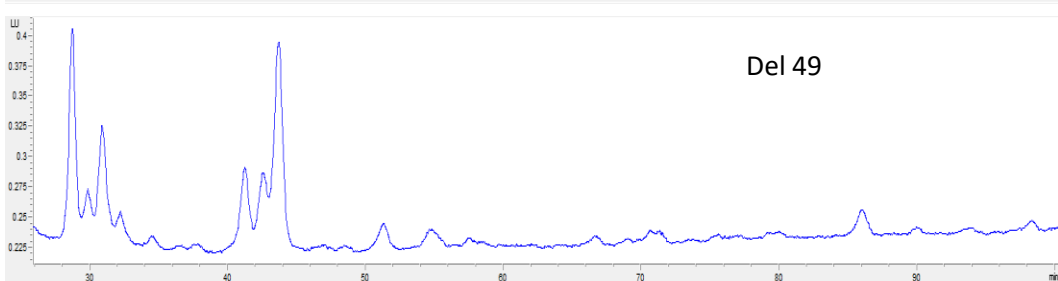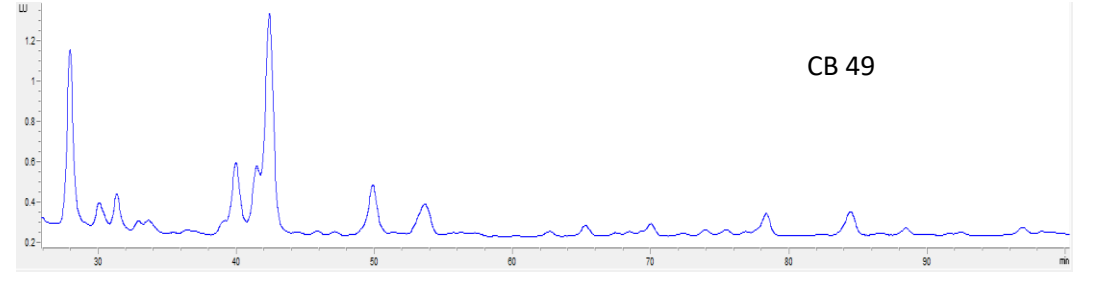

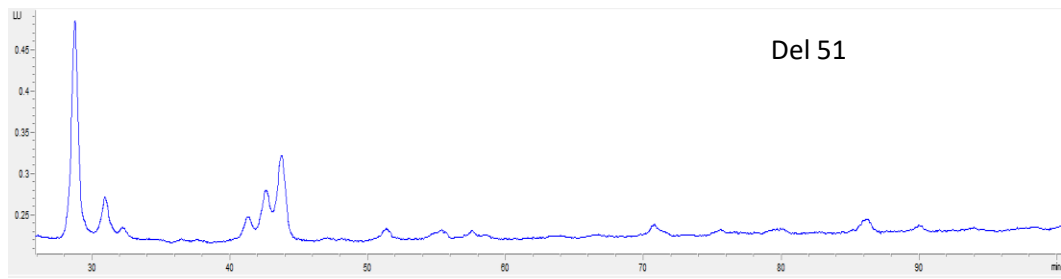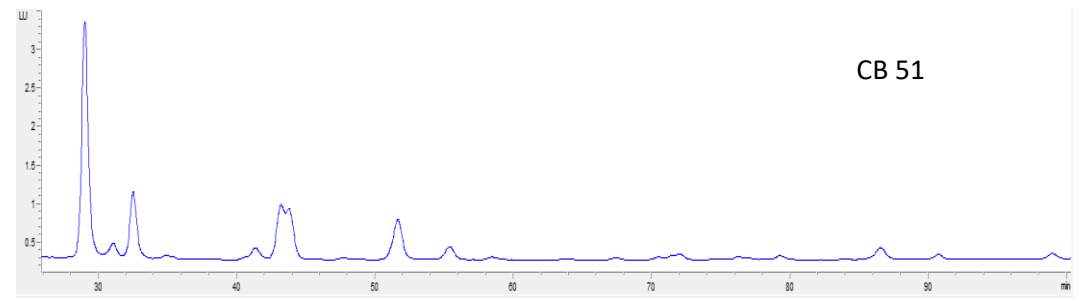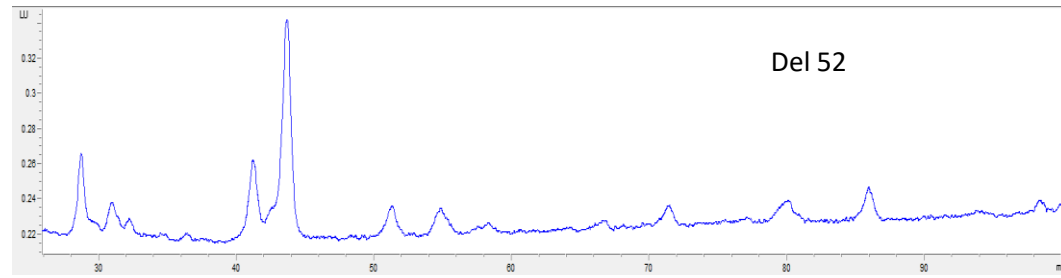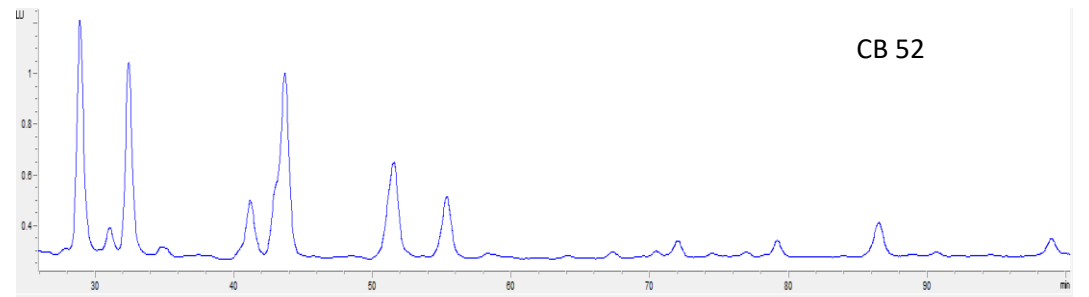

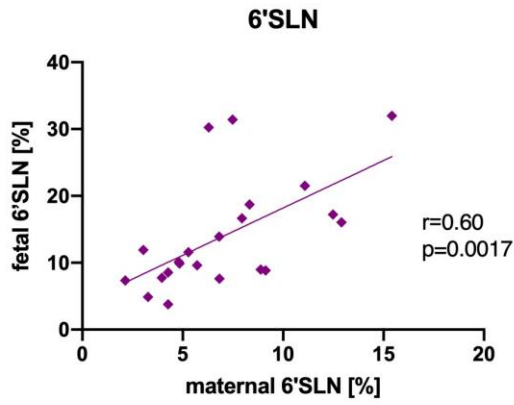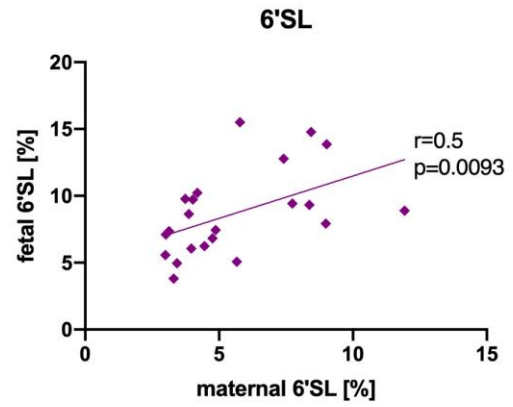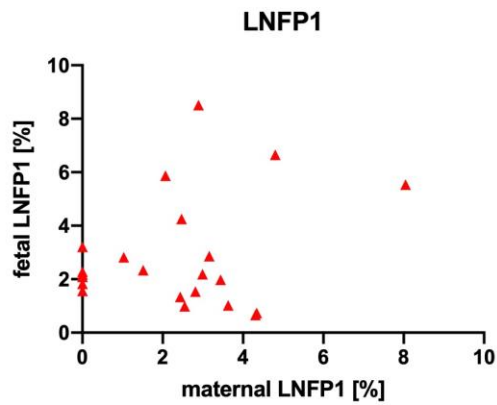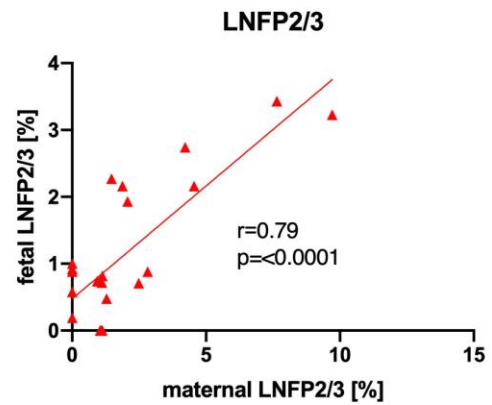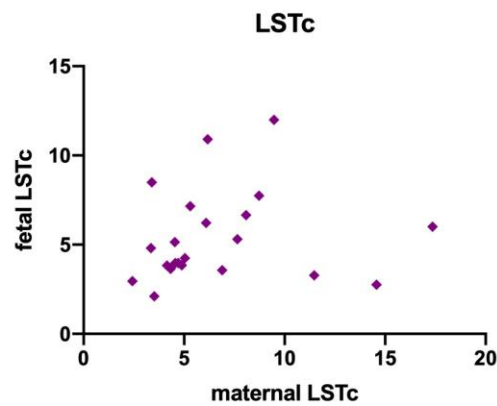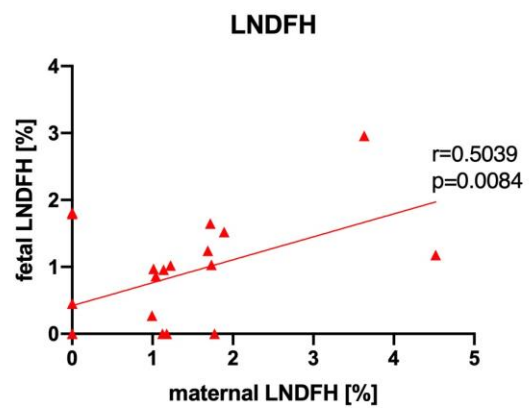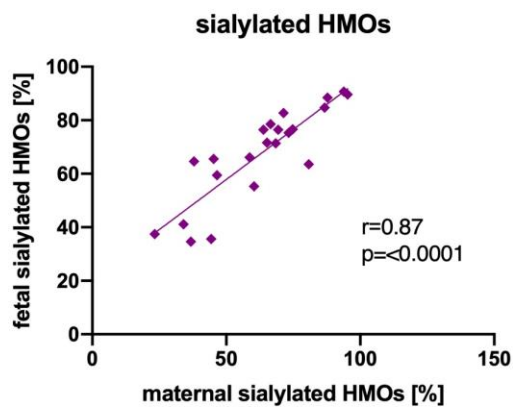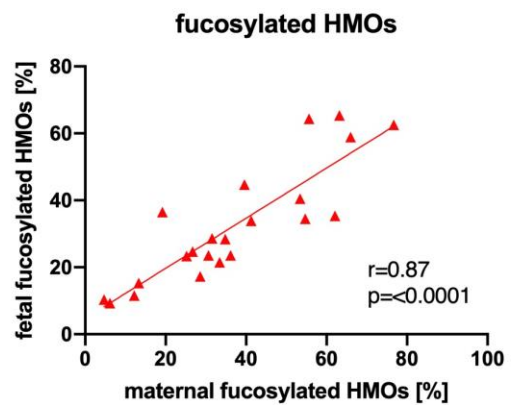

Supplement: nutrients-11-02640-s001.pdf [file nutrients-11-02640-s001.pdf]
